# Supplementary material for: Stepwise Embryonic Toxicity of Silver Nanoparticles onOryzias latipes
Source: Hindawi journal article supplement (doi:10.1155/2013/494671), 2013-01-01
Supplement: f1 [file 494671.f1.pdf]

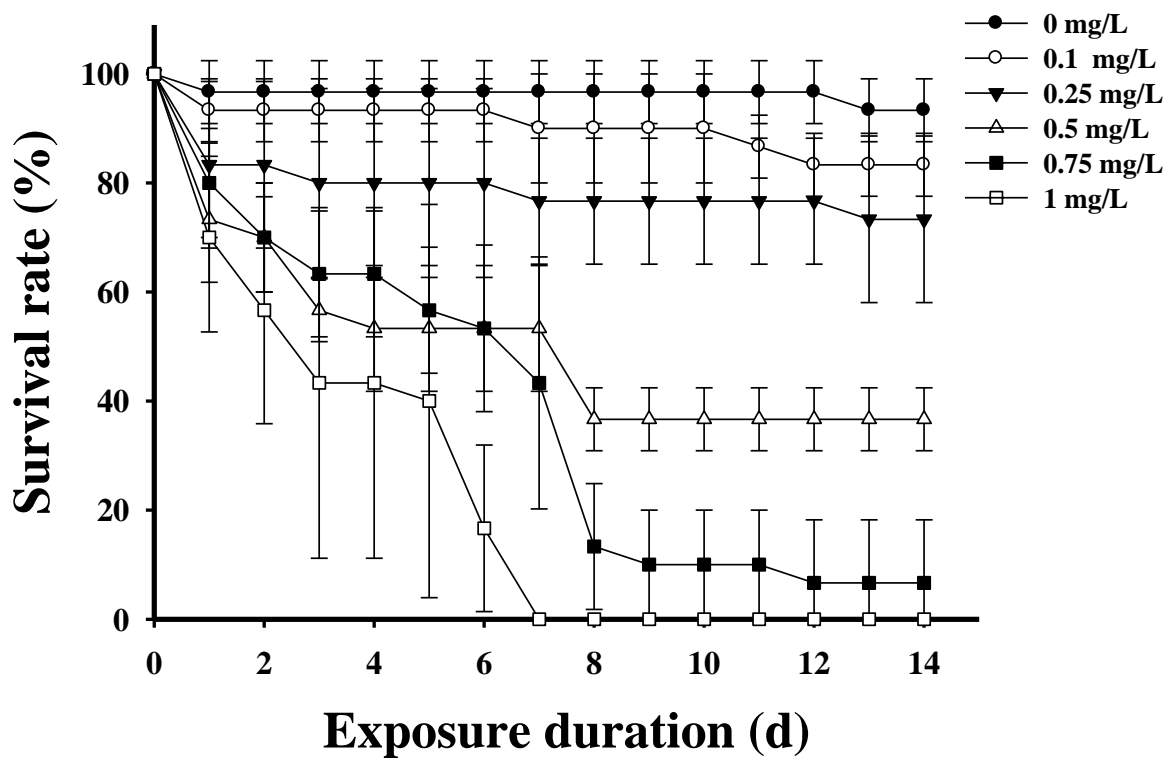

314  
 315 Fig. S1. The cumulative survival rate of *Oryzias latipes* embryos on exposure to different AgNPs  
 316 concentrations over a 14-d period.

317 Table S1. Acute toxicity of AgNPs to embryos of *Oryzias latipes*

| Exposure duration | LC50 (95% confidence interval) (mg/L) |                       |
|-------------------|---------------------------------------|-----------------------|
|                   | Embryo (<24 h of spawning)            | Adult (~4 months old) |
| 24 h              | 1.46 (0.81-2.10)                      | >1                    |
| 48 h              | 1.06 (0.78-1.35)                      | 0.80 (0.65-0.96)      |
| 74 h              | 0.85 (0.68-1.02)                      | 0.80 (0.65-0.96)      |
| 96 h              | 0.84 (0.67-1.00)                      | 0.80 (0.65-0.96)      |
| 5 d               | 0.78 (0.64-0.93)                      |                       |
| 6 d               | 0.65 (0.56-0.75)                      |                       |
| 7 d               | 0.55 (0.47-0.62)                      |                       |
| 8 d               | 0.43 (0.37-0.49)                      |                       |
| 9 d               | 0.42 (0.36-0.48)                      |                       |
| 10 d              | 0.42 (0.36-0.48)                      |                       |
| 11 d              | 0.41 (0.35-0.48)                      |                       |
| 12 d              | 0.40 (0.34-0.46)                      |                       |
| 13 d              | 0.39 (0.32-0.45)                      |                       |
| 14 d              | 0.39 (0.32-0.45)                      |                       |

318

319

320
